# Supplementary material for: A hysteresis-free perovskite transistor with exceptional stability through molecular cross-linking and amine-based surface passivation
Source: Royal Society of Chemistry journal article supplement (doi:10.1039/c9nr10745b), 2020-01-01
Supplement: c9nr10745b1.pdf [file c9nr10745b1.pdf]

## Hysteresis-free perovskite transistor with exceptional stability through molecular cross-linking and amine-based surface passivation

Hyeong Pil Kim,<sup>a</sup> Maria Vasilopoulou,<sup>b,\*</sup> Habib Ullah,<sup>c</sup> Salma Bibi,<sup>c</sup> Anderson Emanuel Ximim Gavim,<sup>d</sup> Andreia Gerniski Macedo,<sup>d</sup> Wilson Jose da Silva,<sup>d</sup> Fabio Kurt Schneider,<sup>d</sup> Asif Ali Tahir,<sup>c</sup> Mohd Asri Mat Teridi,<sup>e</sup> Peng Gao,<sup>f</sup> Abd. Rashid bin Mohd Yusoff<sup>g,\*</sup> and Mohammad Khaja Nazeeruddin<sup>h,\*</sup>

<sup>a</sup>Advanced Display Research Center, Department of Information Display, Kyung Hee University, Dongdaemoon-gu, Seoul 130-701, South Korea.

<sup>b</sup>Institute of Nanoscience and Nanotechnology, National Center for Scientific Research “Demokritos”, 15341 Agia Paraskevi, Attica, Greece. Email: m.vasilopoulou@inn.demokritos.gr

<sup>c</sup>Environment and Sustainability Institute, University of Exeter, Penryn Campus, Penryn, Cornwall TR10 9FE, United Kingdom.

<sup>d</sup>Universidade Tecnológica Federal do Parana–Av. Sete de Setembro, 3165–CEP 80230-901, Curitiba, Parana, Brazil.

<sup>e</sup>Solar Energy Research Institute, Universiti Kebangsaan Malaysia, 43600 Bangi, Selangor, Malaysia.

<sup>f</sup>CAS Key Laboratory of Design and Assembly of Functional Nanostructures, and Fujian Provincial Key Laboratory of Nanomaterials, Fujian Institute of Research on the Structure of Matter, Chinese Academy of Sciences, Fuzhou, Fujian 350002, China. peng.gao@fjirsm.ac.cn

<sup>g</sup>Department of Physics, Swansea University, Vivian Tower, Singleton Park, SA2 8PP, Swansea, United Kingdom. E-mail: a.r.mohdyusoff@swansea.ac.uk

<sup>h</sup>Institute of Chemical Sciences and Engineering, École Polytechnique Fédérale de Lausanne (EPFL), Rue de l’Industrie 17, CH-1951 Sion, Switzerland. Email: mdkhaja.nazeeruddin@epfl.ch



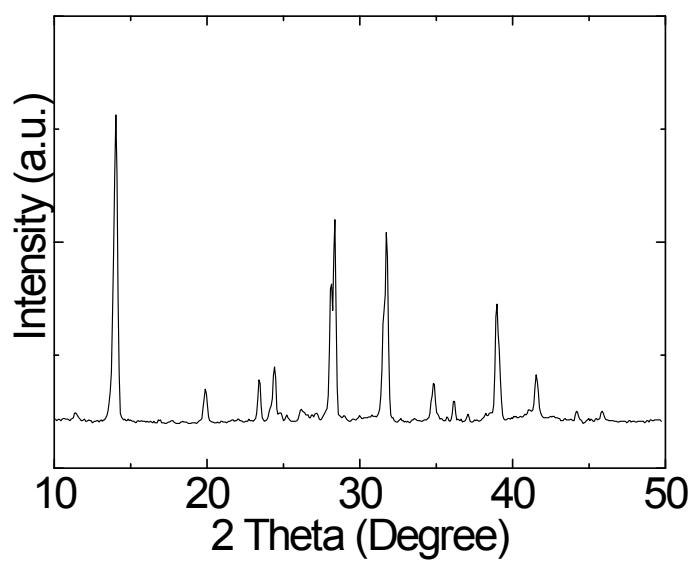

**Figure S3.** Powder X-ray diffraction (PXRD) pattern of the DPP-modified perovskite material.

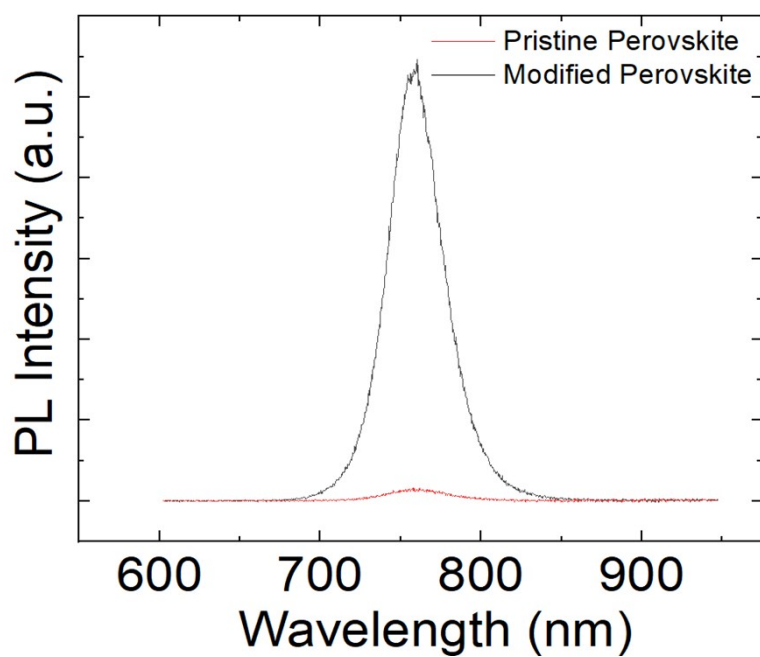

**Figure S4.** Comparison of the steady-state photoluminescence (PL) spectra for the unmodified-CsMAFA and DPP modified-CsMAFA films deposited on a SiO<sub>2</sub>/Si substrate.

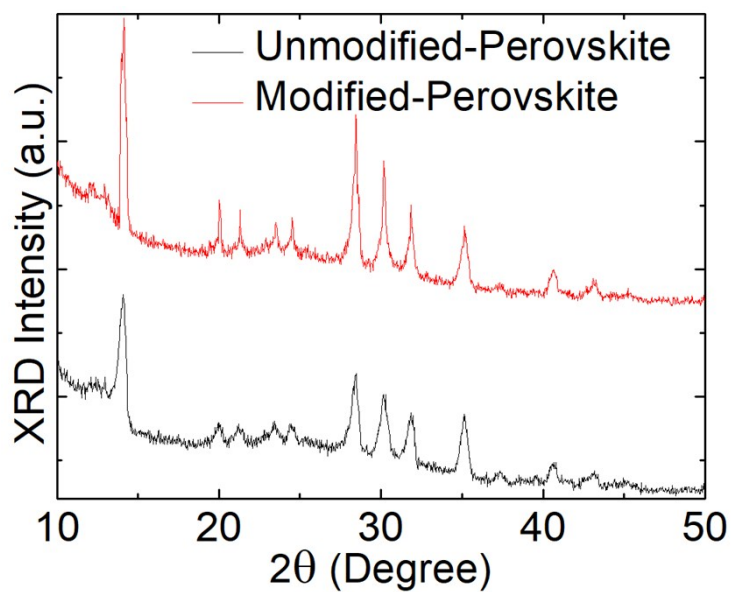

**Figure S5.** XRD patterns of DPP modified-CsMAFA and unmodified-CsMAFA films.

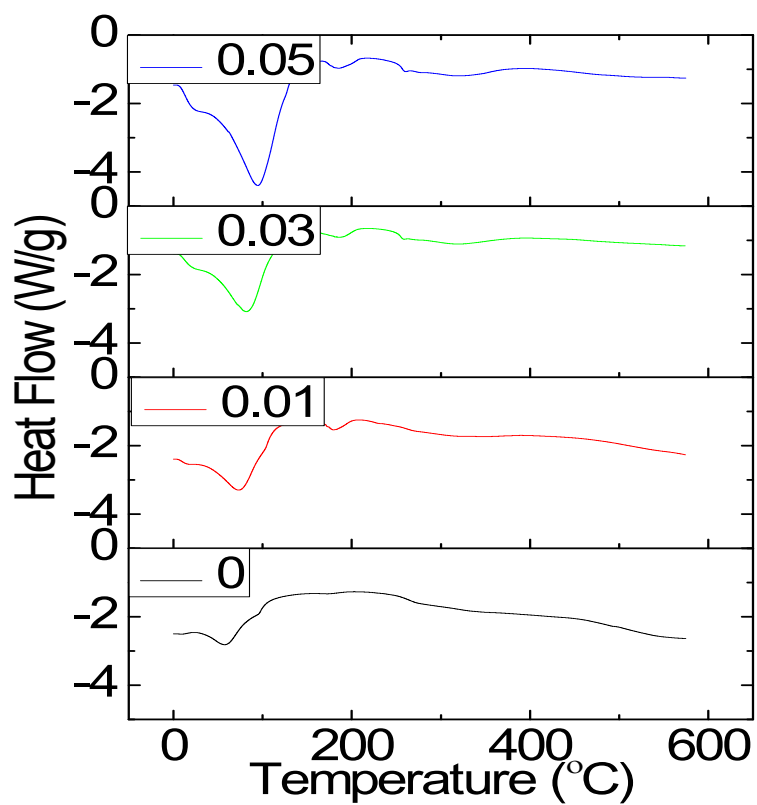

**Figure S6.** Differential scanning calorimetry of modified  $\text{DPP}_x\text{-CsMAFA}_{(1-x)}$  ( $x=0, 0.01, 0.03,$  and  $0.05$ ) samples.

**a, 0.05**

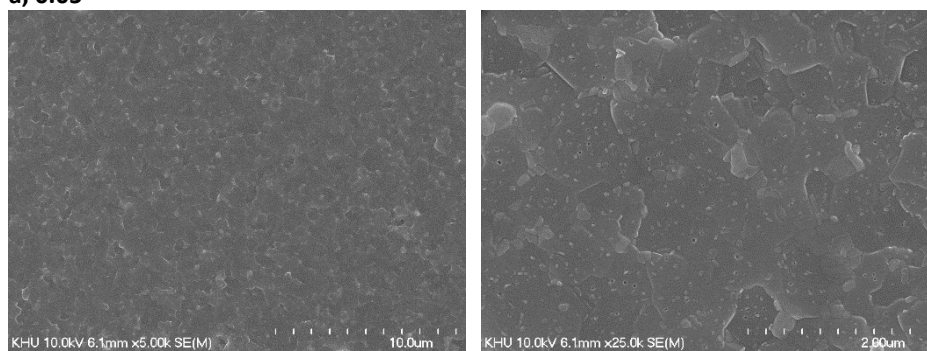

**b, 0.03**

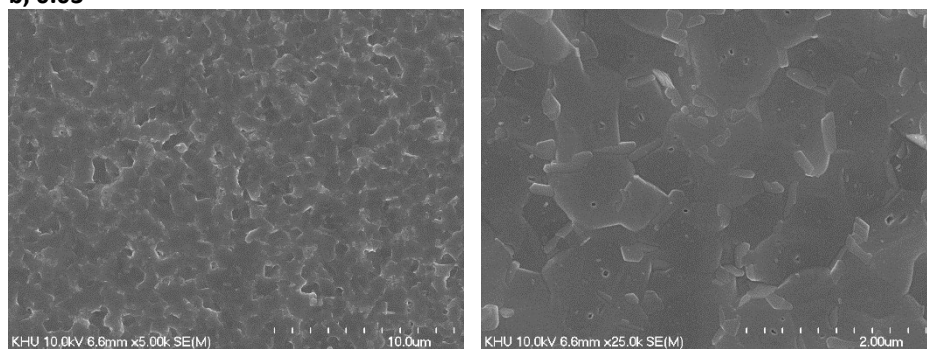

**c, 0.01**

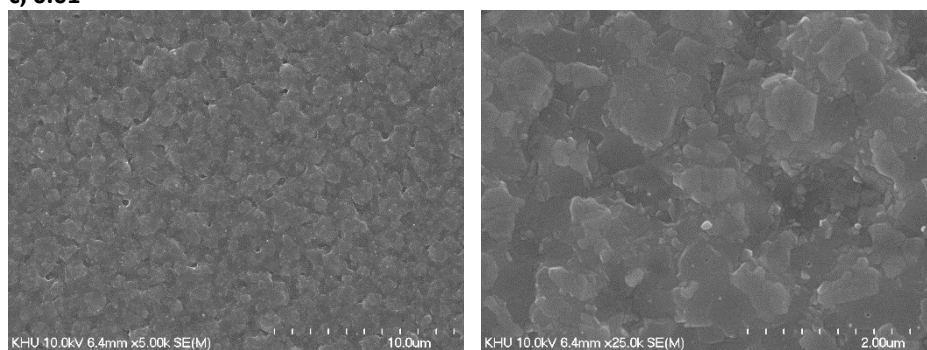

**d, 0**

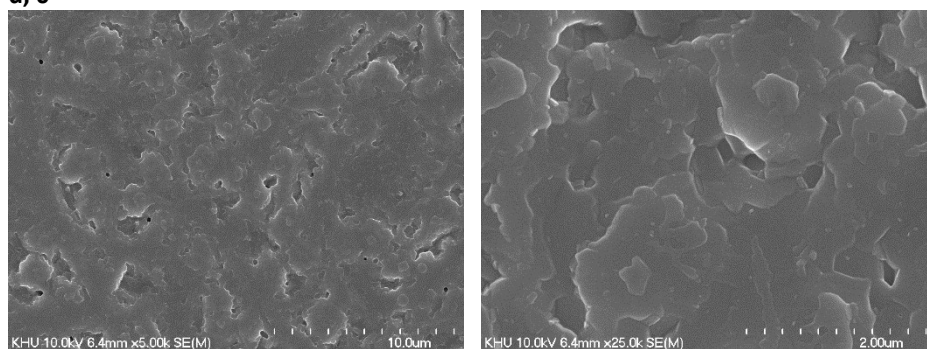

**Figure S7.** Comparison of the morphology for the (a-c) modified- ( $\text{DPP}_{(x)}\text{-CsMAFA}_{(1-x)}$ ) ( $x=0, 0.01, 0.03,$  and  $0.05$ ) and unmodified- (d) CsMAFA films deposited on  $\text{SiO}_2/\text{Si}$  substrates. Dense films with fully coverage on the substrates were only achieved by spin-coating the modified-CsMAFA solutions.

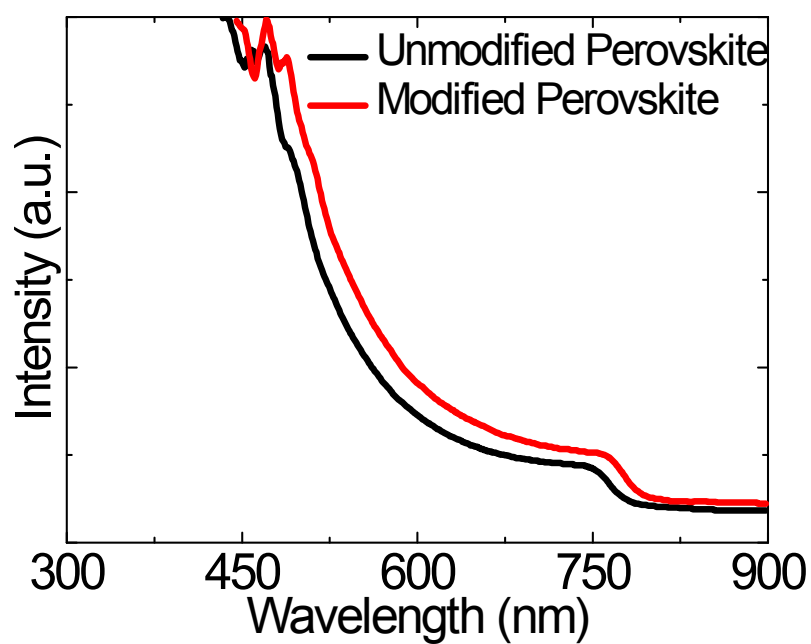

**Figure S8.** UV-Vis absorption spectra of the unmodified-CsMAFA and DPP modified-CsMAFA films. The red shift of the absorption onset of the DPP-modified film indicates a reduction in the optical bandgap value of the perovskite material (from 1.58 to 1.53 eV) which was also theoretically predicted.

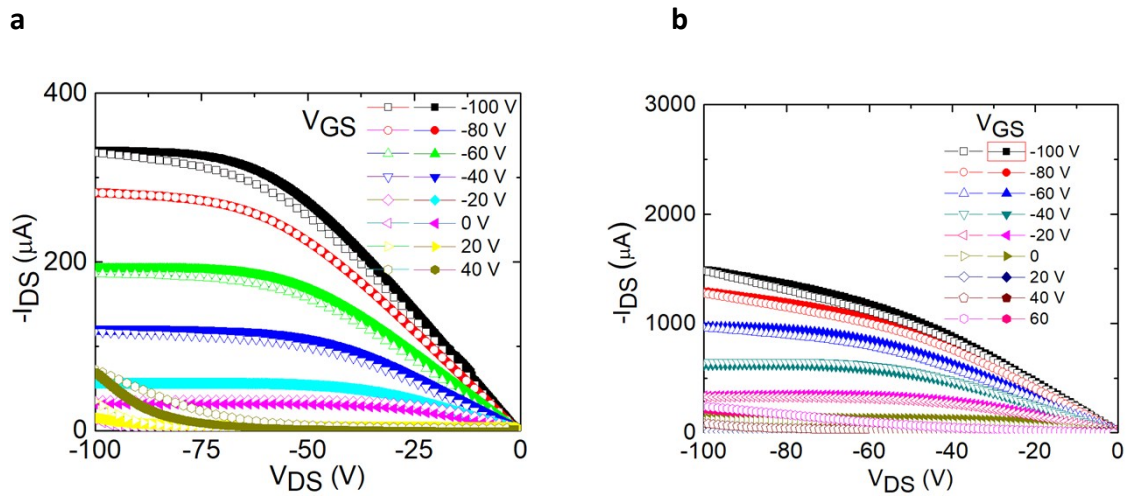

**Figure S9.** Performance characteristics of the unmodified and DPP modified perovskite FETs on hole operation. Hole output characteristics of (a) unmodified and (b) DPP modified-CsMAFA FETs for different  $V_{GS}$  measured at room temperature.

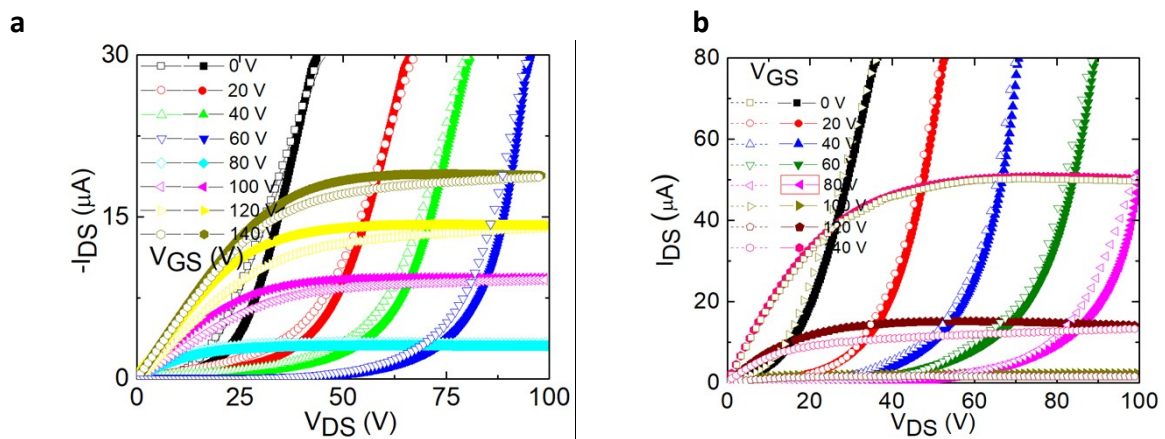

**Figure S10.** Performance characteristics of the unmodified and DPP modified perovskite FETs on electron operation. Electron output characteristics of (a) unmodified and (b) DPP modified-CsMAFA FETs for different  $V_{GS}$  measured at room temperature.

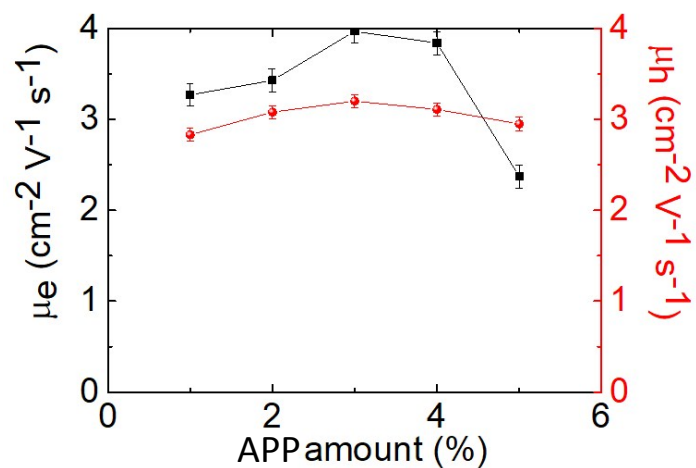

**Figure S11.** The room temperature  $\mu_h$  and  $\mu_e$  variations as a function of DPP amount.

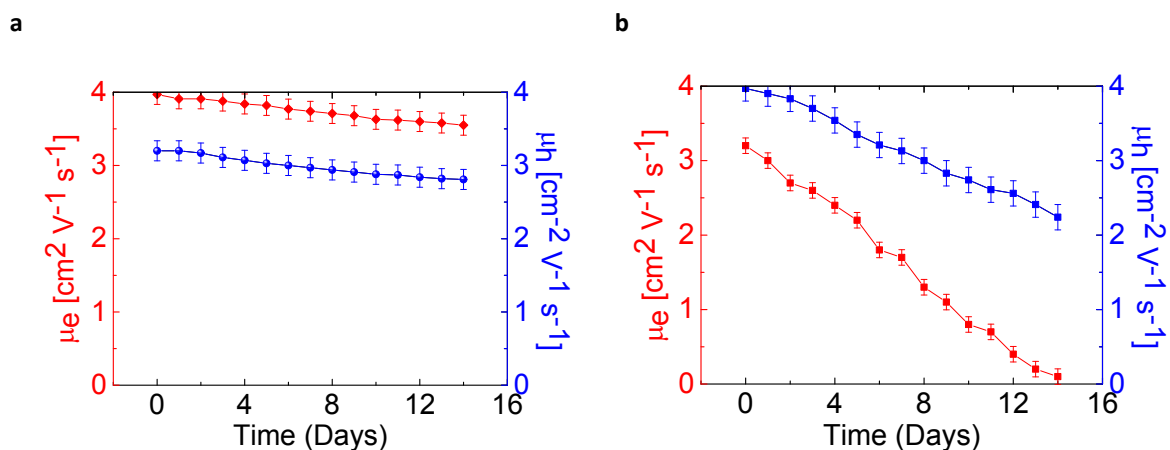

**Figure S12.** The room temperature hole and electron mobilities versus time for both (a) modified- and (b) unmodified-CsMAFA.

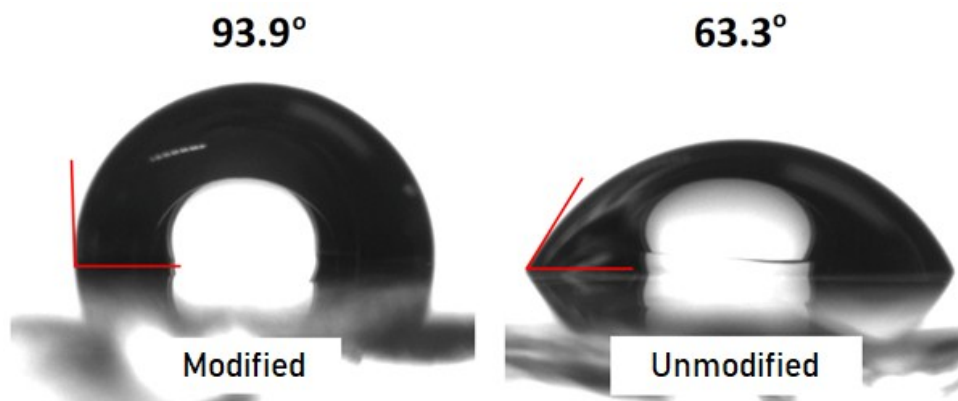

**Figure S13.** The contact angles of water on modified-CsMAFA film (left) and on unmodified-CsMAFA film (right).



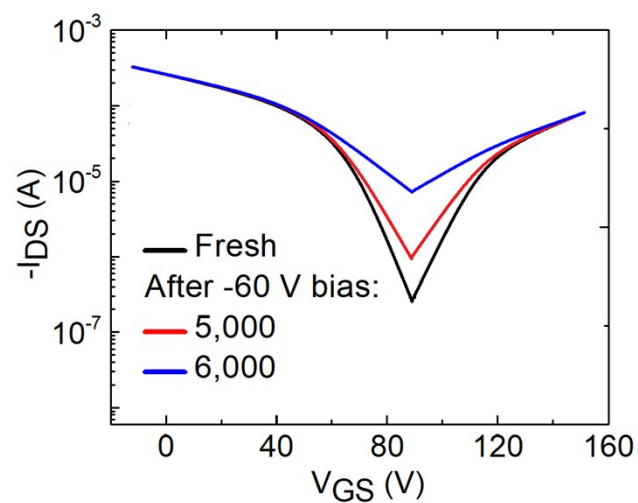

**Figure S14.** Variation of the channel current ( $I_{SD}$ - $V_{GS}$ ) under a continuous bias stress of -20 V for different times up to 6,000 s.

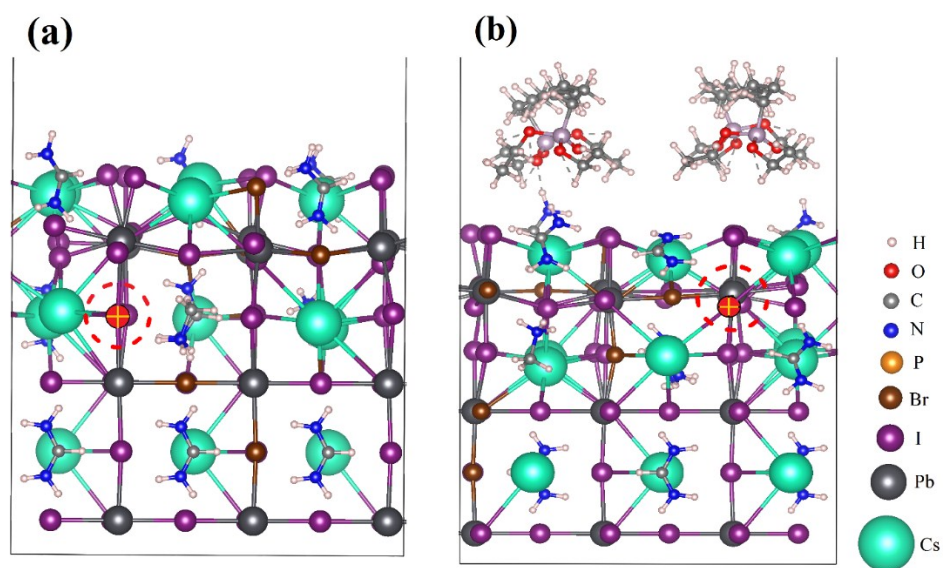

**Figure S15.** Optimized stable geometrical structure with 2% I vacancy of (a) unmodified-CsMAFA and (b) and modified-CsMAFA. The red circles show the iodide vacancy.

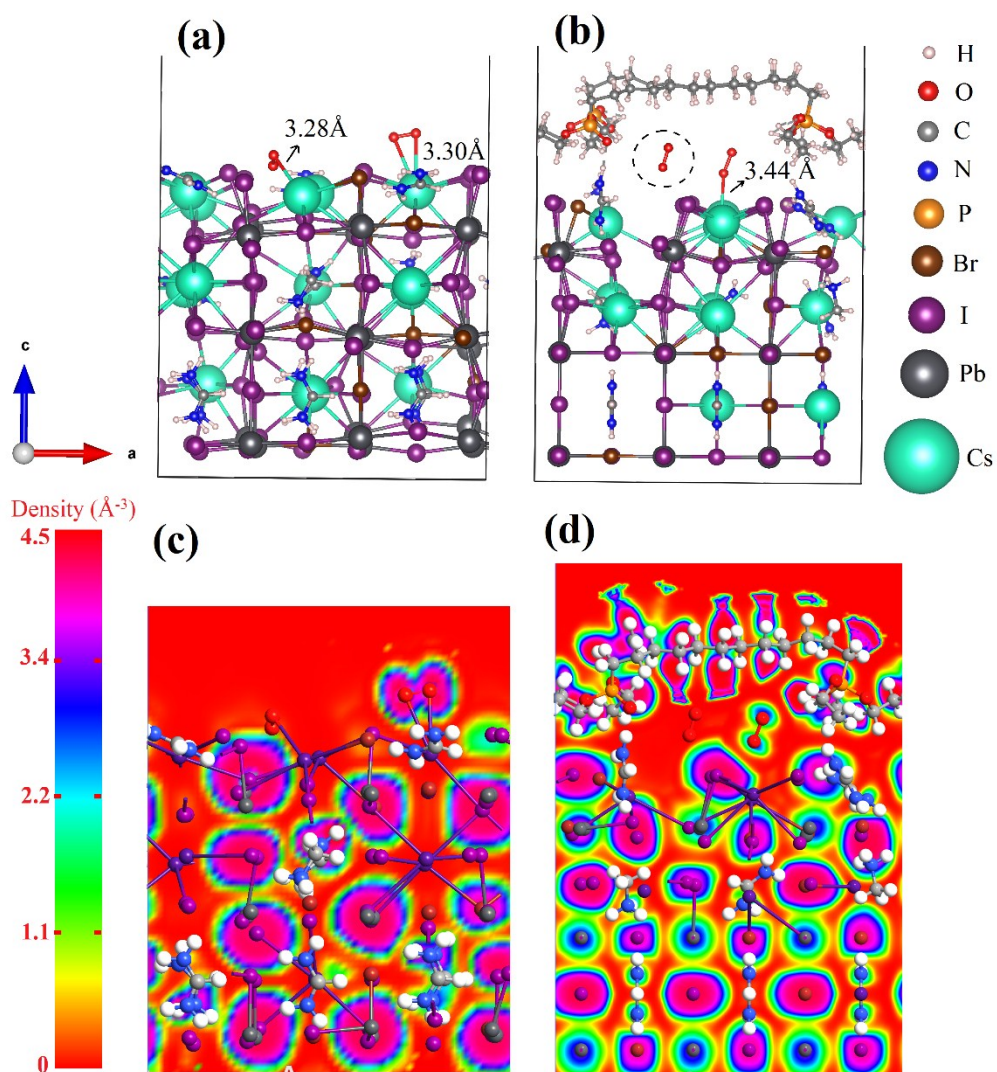

**Figure S16.** Optimized relaxed structure of (a) unmodified-CsMAFA@O<sub>2</sub>, where the oxygen molecules are attached to Cs surface atoms at about 3.30 Å. (b) Optimized structure of modified-CsMAFA@O<sub>2</sub>, where two oxygen molecules are inserted between crosslinker and perovskite surface; one of the oxygen atoms interacts with Cs surface atom at about 3.44 Å above the perovskite surface. Electronic total charge density slices of the (c) O<sub>2</sub> adsorbed on unmodified-CsMAFA and (d) O<sub>2</sub> adsorbed on modified-CsMAFA.

**Table S1.** Summary of glass transition temperatures for modified-CsMAFA with different crosslinker amounts.

| Crosslinker | Perovskite composition | T <sub>g</sub> (°C) |
|-------------|------------------------|---------------------|
| 0           | 100                    | 58.6                |
| 0.01        | 0.99                   | 74.5                |
| 0.03        | 0.97                   | 80.8                |
| 0.05        | 0.96                   | 94.1                |

**Table S2** Simulated total energy of unmodified-CsMAFA, modified-CsMAFA, DPP, water, O<sub>2</sub>, and per molecule water and oxygen adsorption energy on the surface of unmodified-CsMAFA and modified-CsMAFA.

| Species                            | Total Energy (eV) | Adsorption Energy (kcal mol <sup>-1</sup> ) |
|------------------------------------|-------------------|---------------------------------------------|
| Unmodified-CsMAFA                  | -55993.3897       |                                             |
| Modified-CsMAFA                    | -69995.7738       | <b>-48.20</b>                               |
| DPP                                | -6999.1015        |                                             |
| Water                              | -466.8687         |                                             |
| Oxygen molecule                    | -860.5647         |                                             |
| Unmodified-CsMAFA@H <sub>2</sub> O | -56936.4168       | <b>-107</b>                                 |
| Unmodified-CsMAFA@O <sub>2</sub>   | -57739.3709       | <b>-286.53</b>                              |
| Modified-CsMAFA@H <sub>2</sub> O   | -70932.6866       | <b>-36.44</b>                               |
| Modified-CsMAFA@O <sub>2</sub>     | -71725.9399       | <b>-104.58</b>                              |

**Table S3.** DFT simulated valence band maximum (VBM), conduction band minimum (CBM), band gap, and effective masses of photogenerated electrons and holes. Effective masses of electrons and holes are estimated from the calculated band structure of CBM and VBM, respectively.

| Species           | Direction in Brillouin zone | m <sub>e</sub> <sup>*</sup> /m <sub>0</sub> (m <sub>e</sub> ) | m <sub>h</sub> <sup>*</sup> /m <sub>0</sub> (m <sub>e</sub> ) | VB (eV)      | CB (eV)     | Band gap (eV) |
|-------------------|-----------------------------|---------------------------------------------------------------|---------------------------------------------------------------|--------------|-------------|---------------|
| Unmodified-CsMAFA | <b>C</b>                    | <b>2.98</b>                                                   | <b>0.15</b>                                                   | <b>-0.79</b> | <b>0.79</b> | <b>1.58</b>   |
|                   | <b>L</b>                    | <b>2.98</b>                                                   | <b>0.15</b>                                                   | <b>-0.79</b> | <b>0.79</b> | <b>1.58</b>   |
|                   | Y                           | 2.94                                                          | 5.25                                                          | -0.93        | 0.79        | 1.72          |
|                   | B                           | 1.00                                                          | 0.14                                                          | -0.84        | 1.04        | 1.88          |
|                   | X                           | 1.00                                                          | 0.14                                                          | -0.84        | 1.04        | 1.88          |
| Modified-CsMAFA   | U                           | 0.16                                                          | 12.24                                                         | -0.88        | 0.72        | 1.60          |
|                   | <b>V</b>                    | <b>0.16</b>                                                   | <b>0.72</b>                                                   | <b>-0.73</b> | <b>0.71</b> | <b>1.44</b>   |
|                   | <b>R</b>                    | <b>0.16</b>                                                   | <b>0.72</b>                                                   | <b>-0.73</b> | <b>0.71</b> | <b>1.44</b>   |
|                   | X                           | 0.16                                                          | 12.24                                                         | -0.88        | 0.72        | 1.60          |
|                   | Y                           | 0.16                                                          | 0.93                                                          | -0.78        | 0.98        | 1.76          |
|                   | T                           | 0.16                                                          | 0.93                                                          | -0.78        | 0.98        | 1.76          |

**Table S4.** FETs performance of unmodified-CsMAFA. The  $p$ -channel and  $n$ -channel characteristics of ambipolar FETs were measured with  $V_{DS} = -100$  and  $100$  V, respectively. ( $L = 50$   $\mu\text{m}$  and  $W = 1000$   $\mu\text{m}$ ).

| Condition  | p-channel                                                      |                                                                |                  |              | n-channel                                                      |                                                                |                  |              |
|------------|----------------------------------------------------------------|----------------------------------------------------------------|------------------|--------------|----------------------------------------------------------------|----------------------------------------------------------------|------------------|--------------|
| $T_a$ [°C] | $\mu_{h,max}$<br>[ $\text{cm}^2 \text{V}^{-1} \text{s}^{-1}$ ] | $\mu_{h,avg}$<br>[ $\text{cm}^2 \text{V}^{-1} \text{s}^{-1}$ ] | $I_{on}/I_{off}$ | $V_t$<br>[V] | $\mu_{e,max}$<br>[ $\text{cm}^2 \text{V}^{-1} \text{s}^{-1}$ ] | $\mu_{e,avg}$<br>[ $\text{cm}^2 \text{V}^{-1} \text{s}^{-1}$ ] | $I_{on}/I_{off}$ | $V_t$<br>[V] |
| RT         | 0.16                                                           | 0.08<br>( $\pm 0.04$ )                                         | $>10^5$          | 4            | $3 \times 10^{-2}$                                             | $2 \times 10^{-2}$<br>( $\pm 0.003$ )                          | $>10^3$          | 84           |
| 50         | 0.52                                                           | 0.47<br>( $\pm 0.03$ )                                         | $>10^6$          | 10           | 0.18                                                           | 0.13 ( $\pm 0.02$ )                                            | $>10^3$          | 102          |
| 100        | 2.21                                                           | 2.19<br>( $\pm 0.14$ )                                         | $>10^5$          | -9           | 0.38                                                           | 0.33 ( $\pm 0.13$ )                                            | $>10^3$          | 80           |
| 150        | 1.31                                                           | 1.35<br>( $\pm 0.16$ )                                         | $>10^6$          | 2            | 0.18                                                           | 0.12 ( $\pm 0.03$ )                                            | $>10^4$          | 94           |

**Table S5.** Performance parameters of FETs based on of DPP modified-CsMAFA. The  $p$ -channel and  $n$ -channel characteristics of ambipolar FETs were measured with  $V_{DS} = -100$  and  $100$  V, respectively. ( $L = 50$   $\mu\text{m}$  and  $W = 1000$   $\mu\text{m}$ ).

| Condition  | p-channel                                                      |                                                                |                  |              | n-channel                                                      |                                                                |                  |           |
|------------|----------------------------------------------------------------|----------------------------------------------------------------|------------------|--------------|----------------------------------------------------------------|----------------------------------------------------------------|------------------|-----------|
| $T_a$ [°C] | $\mu_{h,max}$<br>[ $\text{cm}^2 \text{V}^{-1} \text{s}^{-1}$ ] | $\mu_{h,avg}$<br>[ $\text{cm}^2 \text{V}^{-1} \text{s}^{-1}$ ] | $I_{on}/I_{off}$ | $V_t$<br>[V] | $\mu_{e,max}$<br>[ $\text{cm}^2 \text{V}^{-1} \text{s}^{-1}$ ] | $\mu_{e,avg}$<br>[ $\text{cm}^2 \text{V}^{-1} \text{s}^{-1}$ ] | $I_{on}/I_{off}$ | $V_t$ [V] |
| RT         | 3.16                                                           | 2.87<br>( $\pm 0.26$ )                                         | $>10^5$          | 4            | 2.37                                                           | 0.18 ( $\pm 0.10$ )                                            | $>10^2$          | 84        |
| 50         | 3.23                                                           | 3.16<br>( $\pm 0.17$ )                                         | $>10^6$          | 10           | 2.79                                                           | 0.65 ( $\pm 0.13$ )                                            | $>10^4$          | 102       |
| 100        | 3.97                                                           | 3.48<br>( $\pm 0.30$ )                                         | $>10^4$          | -9           | 3.20                                                           | 3.17 ( $\pm 0.20$ )                                            | $>10$            | 80        |
| 150        | 2.27                                                           | 1.99<br>( $\pm 0.25$ )                                         | $>10^4$          | 2            | 2.21                                                           | 0.93 ( $\pm 0.33$ )                                            | $>10^2$          | 94        |

**Table S6.** Performance summary of DPP modified and PEIE treated FETs. The  $p$ -channel and  $n$ -channel characteristics of ambipolar FETs were measured with  $V_{DS} = -100$  and  $100$  V, respectively. ( $L = 50$   $\mu\text{m}$  and  $W = 1000$   $\mu\text{m}$ ).

| Condition  | p-channel                                                      |                                                                |                  |              | n-channel                                                      |                                                                |                  |           |
|------------|----------------------------------------------------------------|----------------------------------------------------------------|------------------|--------------|----------------------------------------------------------------|----------------------------------------------------------------|------------------|-----------|
| $T_a$ [°C] | $\mu_{h,max}$<br>[ $\text{cm}^2 \text{V}^{-1} \text{s}^{-1}$ ] | $\mu_{h,avg}$<br>[ $\text{cm}^2 \text{V}^{-1} \text{s}^{-1}$ ] | $I_{on}/I_{off}$ | $V_t$<br>[V] | $\mu_{e,max}$<br>[ $\text{cm}^2 \text{V}^{-1} \text{s}^{-1}$ ] | $\mu_{e,avg}$<br>[ $\text{cm}^2 \text{V}^{-1} \text{s}^{-1}$ ] | $I_{on}/I_{off}$ | $V_t$ [V] |
| N/A        | 3.21                                                           | 2.92<br>( $\pm 0.11$ )                                         | $>10^5$          | 3            | 2.42                                                           | 0.23 ( $\pm 0.10$ )                                            | $>10^2$          | 81        |
| 50         | 3.31                                                           | 3.18<br>( $\pm 0.12$ )                                         | $>10^6$          | 11           | 2.84                                                           | 0.74 ( $\pm 0.16$ )                                            | $>10^4$          | 105       |
| 100        | 4.02                                                           | 3.52<br>( $\pm 0.22$ )                                         | $>10^4$          | -7           | 3.35                                                           | 3.25 ( $\pm 0.13$ )                                            | $>10$            | 82        |
| 150        | 2.32                                                           | 2.04<br>( $\pm 0.11$ )                                         | $>10^4$          | 3            | 2.26                                                           | 0.98 ( $\pm 0.15$ )                                            | $>10^2$          | 94        |

**Table S7.** The state-of-art atmospheric conditions measured perovskite FET characteristics reported.

| Material                                                                                          | Hole mobility<br>( $\text{cm}^2 \text{V}^{-1} \text{s}^{-1}$ ) | Electron<br>mobility<br>( $\text{cm}^2 \text{V}^{-1} \text{s}^{-1}$ ) | Subthreshold Swing<br>(Holes/electrons)<br>( $\text{mV dec}^{-1}$ ) | Hysteresis | Ref.             |
|---------------------------------------------------------------------------------------------------|----------------------------------------------------------------|-----------------------------------------------------------------------|---------------------------------------------------------------------|------------|------------------|
| $\text{CH}_3\text{NH}_3\text{PbI}_3$                                                              | $5 \times 10^{-4}$                                             | $10^{-4}$                                                             | -                                                                   | Yes        | [2]              |
| $\text{CH}_3\text{NH}_3\text{PbI}_3$                                                              | 0.18                                                           | 0.17                                                                  | -                                                                   | Yes        | [3]              |
| $\text{CH}_3\text{NH}_3\text{PbI}_{3-x}\text{Cl}_x$                                               | 1.24                                                           | 1.01                                                                  | -                                                                   | Yes        | [3]              |
| $\text{CH}_3\text{NH}_3\text{PbI}_{3-x}\text{Cl}_x$                                               | 1.3                                                            | 1.0                                                                   | 2100/1500                                                           | Yes        | [4]              |
| $\text{Cs}_x(\text{MA}_{0.17}\text{FA}_{0.83})_{1-x}\text{Pb}(\text{Br}_{0.17}\text{I}_{0.83})_3$ | 2.02                                                           | 2.39                                                                  | -                                                                   | Yes        | [5]              |
| $\text{CH}_3\text{NH}_3\text{PbI}_3$                                                              | -                                                              | 0.05                                                                  | -                                                                   | Yes        | [6]              |
| $\text{CsPbBr}_3$                                                                                 | 0.32                                                           | -                                                                     | -                                                                   | Yes        | [7]              |
| $(\text{PEA})_2\text{SnI}_4$                                                                      | 0.33                                                           | -                                                                     | 7100                                                                | Yes        | [8]              |
| $\text{Cs}_x(\text{MA}_{0.17}\text{FA}_{0.83})_{1-x}\text{Pb}(\text{Br}_{0.17}\text{I}_{0.83})_3$ | <b>4.02</b>                                                    | <b>3.35</b>                                                           | <b>288/267</b>                                                      | <b>No</b>  | <b>This work</b> |

**Table S8.** Formation energies of defective unmodified-CsMAFA and modified-CsMAFA; 2% Iodide vacancy was created in both species.

| Species           | Formation Energy (eV) |
|-------------------|-----------------------|
| Unmodified-CsMAFA | 2.41                  |
| Modified-CsMAFA   | 2.87                  |

**Table S9.** Relaxed fractional coordinates of unmodified-CsMAFA.

[ 0.0337417983 , 0.2350240052 , 0.1693574626 ],  
 [ 0.041508993804, 0.198399904459, 0.514029243983],  
 [ 0.0337417983 , 0.5571200252 , 0.1693574626 ],  
 [ 0.033153337969, 0.884456318424, 0.344921150334],  
 [ 0.376989007 , 0.2350240052 , 0.1693574626 ],  
 [ 0.393626336562, 0.569790886098, 0.351154788864],  
 [ 0.376989007 , 0.8792219758 , 0.1693574626 ],  
 [ 0.376152758129, 0.845243921186, 0.509338866551],  
 [ 0.7202290296 , 0.2350240052 , 0.1693574626 ],  
 [ 0.70166583662, 0.186889162982, 0.493640899472],  
 [ 0.7202290296 , 0.5571200252 , 0.1693574626 ],  
 [ 0.708049589335, 0.847101755856, 0.315214872492],  
 [ 0.704870064218, 0.808565524961, 0.49774224921 ],  
 [ 0.0337417983 , 0.2350240052 , 0.0976282807 ],  
 [ 0.065812803891, 0.200761321372, 0.447948471508],  
 [ 0.0337417983 , 0.5571200252 , 0.0976282807 ],  
 [ 0.033203178638, 0.8815983103 , 0.270380624143],  
 [ 0.376989007 , 0.2350240052 , 0.0976282807 ],  
 [ 0.374289867197, 0.225737218315, 0.276978129327],  
 [ 0.375873105721, 0.570819499155, 0.280635295428],  
 [ 0.376989007 , 0.8792219758 , 0.0976282807 ],  
 [ 0.388539621072, 0.866668006958, 0.441468249657],  
 [ 0.7202290296 , 0.2350240052 , 0.0976282807 ],  
 [ 0.730179127347, 0.217600654291, 0.428103436381],  
 [ 0.7202290296 , 0.5571200252 , 0.0976282807 ],

[ 0.734954762186, 0.883787176448, 0.440970170433],  
[ 0.1797589958 , 0.2350240052 , 0.1334928717 ],  
[ 0.171651322264, 0.281500146195, 0.492219818263],  
[ 0.1797589958 , 0.5571200252 , 0.1334928717 ],  
[ 0.179571946892, 0.879552734297, 0.308653123537],  
[ 0.5230039954 , 0.2350240052 , 0.1334928717 ],  
[ 0.514279541139, 0.196072559865, 0.315998694705],  
[ 0.526874333092, 0.538084064631, 0.306407135998],  
[ 0.5230039954 , 0.8792219758 , 0.1334928717 ],  
[ 0.519048860373, 0.904895590195, 0.486186110273],  
[ 0.866245985 , 0.2350240052 , 0.1334928717 ],  
[ 0.842847322686, 0.260315076712, 0.483334139345],  
[ 0.866245985 , 0.5571200252 , 0.1334928717 ],  
[ 0.842514235081, 0.931647543456, 0.303974283283],  
[ 0.861439561154, 0.849355254264, 0.490138146225],  
[ 0.1200509966 , 0.2350240052 , 0.0784997093 ],  
[ 0.146033122583, 0.242196760203, 0.433481446211],  
[ 0.1200509966 , 0.5571200252 , 0.0784997093 ],  
[ 0.122406113917, 0.879372962262, 0.253386941617],  
[ 0.4632970095 , 0.2350240052 , 0.0784997093 ],  
[ 0.45696184871 , 0.251857029808, 0.263931925227],  
[ 0.454213236459, 0.551429678009, 0.255243576235],  
[ 0.4632970095 , 0.8792219758 , 0.0784997093 ],  
[ 0.47576594017 , 0.892474353738, 0.427385113467],  
[ 0.8065389991 , 0.2350240052 , 0.0784997093 ],  
[ 0.818878889717, 0.248028900911, 0.421024287392],  
[ 0.8065389991 , 0.5571200252 , 0.0784997093 ],  
[ 0.829262066681, 0.898406880518, 0.435361946029],  
[ 0.1200509966 , 0.2350240052 , 0.1884866222 ],  
[ 0.100336836384, 0.246558627863, 0.542427747927],  
[ 0.1200509966 , 0.5571200252 , 0.1884866222 ],  
[ 0.120986313542, 0.884006171707, 0.363608580182],  
[ 0.4632970095 , 0.2350240052 , 0.1884866222 ],  
[ 0.483992551504, 0.555078236567, 0.365226371789],  
[ 0.4632970095 , 0.8792219758 , 0.1884866222 ],  
[ 0.448033644947, 0.874455064923, 0.537260358888],  
[ 0.8065389991 , 0.2350240052 , 0.1884866222 ],  
[ 0.761840332978, 0.21766451715 , 0.527214595542],  
[ 0.8065389991 , 0.5571200252 , 0.1884866222 ],  
[ 0.782674304867, 0.843351320175, 0.340978989358],  
[ 0.778532926864, 0.795001922432, 0.526636428418],  
[ 0.761902062654, 0.934304674907, 0.276150009463],  
[ 0.733347464967, 0.913968461321, 0.340873760276],  
[ 0.817637337202, 0.859972021529, 0.276530349234],  
[ 0.425913756681, 0.167592056987, 0.330165235463],  
[ 0.446955725222, 0.255803313699, 0.330746722865],  
[ 0.436511642134, 0.169303002043, 0.262975132772],  
[ 0.2732799947 , 0.0739753991 , 0.0444346811 ],  
[ 0.2732799947 , 0.0739753991 , 0.2225513519 ],  
[ 0.27723342225 , 0.058389588421, 0.404973411708],  
[ 0.2732799947 , 0.3960720002 , 0.0444346811 ],  
[ 0.2732799947 , 0.3960720002 , 0.2225513519 ],  
[ 0.286841406397, 0.397611111849, 0.408395787107],  
[ 0.2732799947 , 0.7181739807 , 0.0444346811 ],  
[ 0.2732799947 , 0.7181739807 , 0.2225513519 ],  
[ 0.288882122058, 0.727492295266, 0.40012385579 ],  
[ 0.6165270209 , 0.0739753991 , 0.0444346811 ],  
[ 0.6165270209 , 0.0739753991 , 0.2225513519 ],

[ 0.627170225543, 0.07017228257 , 0.395544499031],  
[ 0.6165270209 , 0.3960720002 , 0.0444346811 ],  
[ 0.6165270209 , 0.3960720002 , 0.2225513519 ],  
[ 0.61091112801 , 0.410897482019, 0.406966048015],  
[ 0.6165270209 , 0.7181739807 , 0.0444346811 ],  
[ 0.6165270209 , 0.7181739807 , 0.2225513519 ],  
[ 0.605407106604, 0.729661035873, 0.394602918624],  
[ 0.9597740173 , 0.0739753991 , 0.0444346811 ],  
[ 0.9597740173 , 0.0739753991 , 0.2225513519 ],  
[ 0.939973487674, 0.076137052018, 0.398941141393],  
[ 0.9597740173 , 0.3960720002 , 0.0444346811 ],  
[ 0.9597740173 , 0.3960720002 , 0.2225513519 ],  
[ 0.950298052637, 0.402815532449, 0.402980362886],  
[ 0.9597740173 , 0.7181739807 , 0.0444346811 ],  
[ 0.9597740173 , 0.7181739807 , 0.2225513519 ],  
[ 0.946596835937, 0.732763726182, 0.402918651005],  
[ 0.1205260008 , 0.2350240052 , 0.1334928717 ],  
[ 0.124739755096, 0.248327945196, 0.488032245 ],  
[ 0.1205260008 , 0.5571200252 , 0.1334928717 ],  
[ 0.120098181772, 0.880717377331, 0.308378777234],  
[ 0.4637669921 , 0.2350240052 , 0.1334928717 ],  
[ 0.456146080669, 0.208053748605, 0.316685945913],  
[ 0.46951875641 , 0.550975464237, 0.310180630613],  
[ 0.4637669921 , 0.8792219758 , 0.1334928717 ],  
[ 0.463688904574, 0.886300826985, 0.48242076673 ],  
[ 0.8070139885 , 0.2350240052 , 0.1334928717 ],  
[ 0.791692546702, 0.237572926766, 0.474794749407],  
[ 0.8070139885 , 0.5571200252 , 0.1334928717 ],  
[ 0.797205353401, 0.902131315128, 0.292849193695],  
[ 0.803844618421, 0.850844773153, 0.482591597503],  
[ 0.2797710001 , 0.0739753991 , 0.1334928717 ],  
[ 0.269405923328, 0.090426857389, 0.307715181674],  
[ 0.311637138359, 0.054604937199, 0.486987084439],  
[ 0.2797710001 , 0.3960720002 , 0.1334928717 ],  
[ 0.292093929318, 0.378563905412, 0.309377197417],  
[ 0.241442263197, 0.404610197811, 0.490159847686],  
[ 0.2797710001 , 0.7181739807 , 0.1334928717 ],  
[ 0.274116038192, 0.692039718158, 0.31118807728 ],  
[ 0.287606534373, 0.753113772752, 0.488453638334],  
[ 0.610680449307, 0.029218322598, 0.30653068824 ],  
[ 0.623010993 , 0.3960720002 , 0.1334928717 ],  
[ 0.618070398788, 0.406712489048, 0.310144753585],  
[ 0.644635274944, 0.436686633504, 0.489264062174],  
[ 0.623010993 , 0.7181739807 , 0.1334928717 ],  
[ 0.601735615934, 0.723380733548, 0.485072039773],  
[ 0.9662579894 , 0.0739753991 , 0.1334928717 ],  
[ 0.971328641205, 0.044067851014, 0.313250553441],  
[ 0.937599317871, 0.128505993027, 0.485626330136],  
[ 0.9662579894 , 0.3960720002 , 0.1334928717 ],  
[ 0.947849277616, 0.404227656158, 0.309804571248],  
[ 0.943192696443, 0.422247549467, 0.487665059775],  
[ 0.95356002279 , 0.726954098788, 0.312125724558],  
[ 0.943945047695, 0.712724922621, 0.490413507494],  
[ 0.1009230018 , 0.0739753991 , 0.0444346811 ],  
[ 0.1009230018 , 0.0739753991 , 0.2225513519 ],  
[ 0.107237370277, 0.042744042479, 0.424351766163],  
[ 0.1009230018 , 0.3960720002 , 0.0444346811 ],  
[ 0.1009230018 , 0.3960720002 , 0.2225513519 ],

[ 0.121012746716, 0.416238853389, 0.382949070287],  
[ 0.1009230018 , 0.7181739807 , 0.0444346811 ],  
[ 0.1009230018 , 0.7181739807 , 0.2225513519 ],  
[ 0.117616161622, 0.706175829442, 0.402871051999],  
[ 0.4441699982 , 0.0739753991 , 0.0444346811 ],  
[ 0.450803817309, 0.046519665359, 0.388303715888],  
[ 0.4441699982 , 0.3960720002 , 0.2225513519 ],  
[ 0.449700748941, 0.383922682072, 0.441187931337],  
[ 0.4441699982 , 0.7181739807 , 0.0444346811 ],  
[ 0.4441699982 , 0.7181739807 , 0.2225513519 ],  
[ 0.7874150276 , 0.0739753991 , 0.0444346811 ],  
[ 0.7874150276 , 0.0739753991 , 0.2225513519 ],  
[ 0.7874150276 , 0.3960720002 , 0.0444346811 ],  
[ 0.77939346043, 0.413358163039, 0.387065430406],  
[ 0.7874150276 , 0.7181739807 , 0.0444346811 ],  
[ 0.7874150276 , 0.7181739807 , 0.2225513519 ],  
[ 0.776942335212, 0.718002157087, 0.387737846903],  
[ 0.2580820024 , 0.2350240052 , 0.0444346811 ],  
[ 0.2580820024 , 0.2350240052 , 0.2225513519 ],  
[ 0.272706586028, 0.230854918479, 0.40024935188 ],  
[ 0.2580820024 , 0.5571200252 , 0.0444346811 ],  
[ 0.2580820024 , 0.5571200252 , 0.2225513519 ],  
[ 0.303283910705, 0.564305107426, 0.414853101397],  
[ 0.2580820024 , 0.8792219758 , 0.0444346811 ],  
[ 0.2580820024 , 0.8792219758 , 0.2225513519 ],  
[ 0.268161746617, 0.891043287434, 0.39001090465 ],  
[ 0.6013219952 , 0.2350240052 , 0.0444346811 ],  
[ 0.6013219952 , 0.2350240052 , 0.2225513519 ],  
[ 0.622042926024, 0.227630844711, 0.381962034651],  
[ 0.6013219952 , 0.5571200252 , 0.0444346811 ],  
[ 0.6013219952 , 0.5571200252 , 0.2225513519 ],  
[ 0.6013219952 , 0.8792219758 , 0.0444346811 ],  
[ 0.6013219952 , 0.8792219758 , 0.2225513519 ],  
[ 0.615141801877, 0.889445595271, 0.402891789236],  
[ 0.9445689916 , 0.2350240052 , 0.2225513519 ],  
[ 0.942006117269, 0.231795186447, 0.378058255962],  
[ 0.9445689916 , 0.5571200252 , 0.0444346811 ],  
[ 0.946569289994, 0.560819517534, 0.389179147722],  
[ 0.9445689916 , 0.8792219758 , 0.0444346811 ],  
[ 0.623010993 , 0.0739753991 , 0.1334928717 ],  
[ 0.620304377471, 0.102406069813, 0.47559676664 ],  
[ 0.619069539271, 0.754131650319, 0.310918402699],  
[ 0.9662579894 , 0.7181739807 , 0.1334928717 ],  
[ 0.4441699982 , 0.0739753991 , 0.2225513519 ],  
[ 0.4441699982 , 0.3960720002 , 0.0444346811 ],  
[ 0.446331270835, 0.743946976238, 0.385033904114],  
[ 0.785096378569, 0.025222746214, 0.388596165244],  
[ 0.7874150276 , 0.3960720002 , 0.2225513519 ],  
[ 0.595864641243, 0.559926924201, 0.398494220562],  
[ 0.9445689916 , 0.2350240052 , 0.0444346811 ],  
[ 0.9445689916 , 0.5571200252 , 0.2225513519 ],  
[ 0.9445689916 , 0.8792219758 , 0.2225513519 ],  
[ 0.953043813302, 0.881768800878, 0.409566689506],  
[ 0.0885604024 , 0.2350240052 , 0.1014000284 ],  
[ 0.108470148779, 0.232357528713, 0.453958745285],  
[ 0.0885604024 , 0.5571200252 , 0.1014000284 ],  
[ 0.088669235733, 0.8810232767 , 0.275967522827],  
[ 0.4318059981 , 0.2350240052 , 0.1014000284 ],



[ 0.429507668846, 0.214201387756, 0.278017819559],  
 [ 0.429780845847, 0.557304800953, 0.28040220485 ],  
 [ 0.4318059981 , 0.8792219758 , 0.1014000284 ],  
 [ 0.440421110125, 0.881185196267, 0.448501610174],  
 [ 0.7750480175 , 0.2350240052 , 0.1014000284 ],  
 [ 0.778804267774, 0.233990078053, 0.43924222625 ],  
 [ 0.7750480175 , 0.5571200252 , 0.1014000284 ],  
 [ 0.787281780485, 0.880917075894, 0.451614914289],  
 [ 0.0885604024 , 0.2350240052 , 0.1655827739 ],  
 [ 0.087337344654, 0.228628498709, 0.517080179577],  
 [ 0.0885604024 , 0.5571200252 , 0.1655827739 ],  
 [ 0.08818781172, 0.881266898511, 0.340859616791],  
 [ 0.4318059981 , 0.2350240052 , 0.1655827739 ],  
 [ 0.446107901123, 0.557335671839, 0.344223210426],  
 [ 0.4318059981 , 0.8792219758 , 0.1655827739 ],  
 [ 0.424913768924, 0.871268262266, 0.511916929407],  
 [ 0.7750480175 , 0.2350240052 , 0.1655827739 ],  
 [ 0.745464047622, 0.217763585409, 0.50047030483 ],  
 [ 0.7750480175 , 0.5571200252 , 0.1655827739 ],  
 [ 0.752807569367, 0.875510633141, 0.324252018237],  
 [ 0.757300560435, 0.82231861661 , 0.505504386144],  
 [ 0.8070139885 , 0.8792219758 , 0.1334928717 ],  
 [ 0.466733337828, 0.870836784664, 0.305625704747],  
 [ 0.1205260008 , 0.8792219758 , 0.1334928717 ],  
 [ 0.116046120173, 0.861630090138, 0.467702779982],  
 [ 0.4637669921 , 0.5571200252 , 0.1334928717 ],  
 [ 0.798503887364, 0.548376685905, 0.295593322073],  
 [ 0.786611124982, 0.566249044938, 0.458830730016],  
 [ 0.091399947642, 0.57352426792 , 0.307046762982],  
 [ 0.475620095627, 0.567803988594, 0.477550409831],  
 [ 0.102649290844, 0.547988249232, 0.464401784497],  
 [ 0.126446664291, 0.252111540713, 0.314366309007],  
 [ 0.45367253017 , 0.191131747413, 0.457957105745],  
 [ 0.780972462976, 0.277214113745, 0.300855210524]

**Table S10.** Relaxed fractional coordinates of modified-CsMAFA.

[ 0.0739754, 0.040226 , 0.0363183 ],  
 [ 0.396072, 0.040226 , 0.0363183 ],  
 [ 0.718174 , 0.040226 , 0.0363183 ],  
 [ 0.235024 , 0.055431 , 0.0363183 ],  
 [ 0.55712 , 0.055431 , 0.0363183 ],  
 [ 0.879222 , 0.055431 , 0.0363183 ],  
 [ 0.0739754 , 0.212585 , 0.0363183 ],  
 [ 0.396072 , 0.212585 , 0.0363183 ],  
 [ 0.718174 , 0.212585 , 0.0363183 ],  
 [ 0.0739754 , 0.383473 , 0.0363183 ],  
 [ 0.396072 , 0.383473 , 0.0363183 ],  
 [ 0.718174 , 0.383473 , 0.0363183 ],  
 [ 0.235024 , 0.398678 , 0.0363183 ],  
 [ 0.55712 , 0.398678 , 0.0363183 ],  
 [ 0.879222 , 0.398678 , 0.0363183 ],  
 [ 0.0739754 , 0.55583 , 0.0363183 ],  
 [ 0.396072 , 0.55583 , 0.0363183 ],  
 [ 0.718174 , 0.55583 , 0.0363183 ],  
 [ 0.0739754 , 0.72672 , 0.0363183 ],

[ 0.396072 , 0.72672 , 0.0363183 ],  
[ 0.718174 , 0.72672 , 0.0363183 ],  
[ 0.235024 , 0.741918 , 0.0363183 ],  
[ 0.55712 , 0.741918 , 0.0363183 ],  
[ 0.879222 , 0.741918 , 0.0363183 ],  
[ 0.0739754 , 0.899077 , 0.0363183 ],  
[ 0.396072 , 0.899077 , 0.0363183 ],  
[ 0.718174 , 0.899077 , 0.0363183 ],  
[ 0.235024 , 0.193461 , 0.064161 ],  
[ 0.55712 , 0.193461 , 0.064161 ],  
[ 0.235024 , 0.536703 , 0.064161 ],  
[ 0.879222 , 0.536703 , 0.064161 ],  
[ 0.235024 , 0.879949 , 0.064161 ],  
[ 0.55712 , 0.879949 , 0.064161 ],  
[ 0.235024 , 0.279771 , 0.0797956 ],  
[ 0.55712 , 0.279771 , 0.0797956 ],  
[ 0.235024 , 0.623011 , 0.0797956 ],  
[ 0.879222 , 0.623011 , 0.0797956 ],  
[ 0.235024 , 0.966258 , 0.0797956 ],  
[ 0.55712 , 0.966258 , 0.0797956 ],  
[ 0.235024 , 0.224952 , 0.0828784 ],  
[ 0.55712 , 0.224952 , 0.0828784 ],  
[ 0.235024 , 0.568194 , 0.0828784 ],  
[ 0.879222 , 0.568194 , 0.0828784 ],  
[ 0.235024 , 0.91144 , 0.0828784 ],  
[ 0.55712 , 0.91144 , 0.0828784 ],  
[ 0.0739754 , 0.033742 , 0.109109 ],  
[ 0.396072 , 0.033742 , 0.109109 ],  
[ 0.718174 , 0.033742 , 0.109109 ],  
[ 0.235024 , 0.133754 , 0.109109 ],  
[ 0.55712 , 0.133754 , 0.109109 ],  
[ 0.235024 , 0.192986 , 0.109109 ],  
[ 0.55712 , 0.192986 , 0.109109 ],  
[ 0.879222 , 0.192986 , 0.109109 ],  
[ 0.0739754 , 0.376989 , 0.109109 ],  
[ 0.396072 , 0.376989 , 0.109109 ],  
[ 0.718174 , 0.376989 , 0.109109 ],  
[ 0.235024 , 0.476996 , 0.109109 ],  
[ 0.879222 , 0.476996 , 0.109109 ],  
[ 0.235024 , 0.536233 , 0.109109 ],  
[ 0.55712 , 0.536233 , 0.109109 ],  
[ 0.879222 , 0.536233 , 0.109109 ],  
[ 0.0739754 , 0.720229 , 0.109109 ],  
[ 0.396072 , 0.720229 , 0.109109 ],  
[ 0.718174 , 0.720229 , 0.109109 ],  
[ 0.235024 , 0.820241 , 0.109109 ],  
[ 0.55712 , 0.820241 , 0.109109 ],  
[ 0.235024 , 0.879474 , 0.109109 ],  
[ 0.55712 , 0.879474 , 0.109109 ],  
[ 0.879222 , 0.879474 , 0.109109 ],  
[ 0.235024 , 0.224952 , 0.135338 ],  
[ 0.55712 , 0.224952 , 0.135338 ],  
[ 0.235024 , 0.568194 , 0.135338 ],  
[ 0.879222 , 0.568194 , 0.135338 ],  
[ 0.235024 , 0.91144 , 0.135338 ],  
[ 0.55712 , 0.91144 , 0.135338 ],  
[ 0.235024 , 0.279771 , 0.138423 ],  
[ 0.55712 , 0.279771 , 0.138423 ],

[ 0.235024 , 0.623011 , 0.138423 ],  
 [ 0.879222 , 0.623011 , 0.138423 ],  
 [ 0.235024 , 0.966258 , 0.138423 ],  
 [ 0.55712 , 0.966258 , 0.138423 ],  
 [ 0.235024 , 0.193461 , 0.154058 ],  
 [ 0.55712 , 0.193461 , 0.154058 ],  
 [ 0.235024 , 0.536703 , 0.154058 ],  
 [ 0.879222 , 0.536703 , 0.154058 ],  
 [ 0.235024 , 0.879949 , 0.154058 ],  
 [ 0.55712 , 0.879949 , 0.154058 ],  
 [ 0.0739754 , 0.040226 , 0.1819 ],  
 [ 0.396072 , 0.040226 , 0.1819 ],  
 [ 0.718174 , 0.040226 , 0.1819 ],  
 [ 0.235024 , 0.055431 , 0.1819 ],  
 [ 0.55712 , 0.055431 , 0.1819 ],  
 [ 0.879222 , 0.055431 , 0.1819 ],  
 [ 0.0739754 , 0.212585 , 0.1819 ],  
 [ 0.396072 , 0.212585 , 0.1819 ],  
 [ 0.718174 , 0.212585 , 0.1819 ],  
 [ 0.0739754 , 0.383473 , 0.1819 ],  
 [ 0.396072 , 0.383473 , 0.1819 ],  
 [ 0.718174 , 0.383473 , 0.1819 ],  
 [ 0.235024 , 0.398678 , 0.1819 ],  
 [ 0.55712 , 0.398678 , 0.1819 ],  
 [ 0.879222 , 0.398678 , 0.1819 ],  
 [ 0.0739754 , 0.55583 , 0.1819 ],  
 [ 0.396072 , 0.55583 , 0.1819 ],  
 [ 0.718174 , 0.55583 , 0.1819 ],  
 [ 0.0739754 , 0.72672 , 0.1819 ],  
 [ 0.396072 , 0.72672 , 0.1819 ],  
 [ 0.718174 , 0.72672 , 0.1819 ],  
 [ 0.235024 , 0.741918 , 0.1819 ],  
 [ 0.55712 , 0.741918 , 0.1819 ],  
 [ 0.879222 , 0.741918 , 0.1819 ],  
 [ 0.0739754 , 0.899077 , 0.1819 ],  
 [ 0.396072 , 0.899077 , 0.1819 ],  
 [ 0.718174 , 0.899077 , 0.1819 ],  
 [ 0.498057251696, 0.571960067963, 0.212747168518],  
 [ 0.915729962703, 0.86637375868 , 0.205411002244],  
 [ 0.244758808475, 0.542912586029, 0.211640819687],  
 [ 0.162147709064, 0.561946873466, 0.211970815814],  
 [ 0.573726260552, 0.618295750185, 0.218044652097],  
 [ 0.891016995688, 0.958113877511, 0.210068757206],  
 [ 0.207803382761, 0.56885007948, 0.223842407122],  
 [ 0.54029598007 , 0.580598686781, 0.225470453902],  
 [ 0.898955113445, 0.906474242916, 0.219437434046],  
 [ 0.217478791462, 0.624153504504, 0.223619956517],  
 [ 0.938757557406, 0.235613560465, 0.232592869898],  
 [ 0.878028825682, 0.162812374888, 0.234160510689],  
 [ 0.189899495347, 0.481432032523, 0.253402875946],  
 [ 0.107622635612, 0.071910072445, 0.252877742614],  
 [ 0.377140396605, 0.037308698107, 0.253851467634],  
 [ 0.734754550373, 0.068294727841, 0.251644748389],  
 [ 0.255543541946, 0.227449246597, 0.242676058608],  
 [ 0.557866423736, 0.22621480572 , 0.23537325739 ],  
 [ 0.923032307812, 0.186224571692, 0.244542908438],  
 [ 0.073301685139, 0.357826700165, 0.251759561095],  
 [ 0.401362942379, 0.386909806607, 0.250265079167],

[ 0.719209114977, 0.41140861217 , 0.249370385712],  
[ 0.513366900422, 0.498793687 , 0.254712266174],  
[ 0.204436743245, 0.538953256901, 0.254725158606],  
[ 0.551178215086, 0.540034894418, 0.249164249878],  
[ 0.859135500036, 0.549635275746, 0.248387337256],  
[ 0.098465739172, 0.716173177788, 0.248299356856],  
[ 0.38814068156 , 0.750228377534, 0.251745538646],  
[ 0.721432494208, 0.710617172012, 0.251170990956],  
[ 0.882907326317, 0.828361622804, 0.251961413074],  
[ 0.231818390106, 0.8909221462 , 0.257154082609],  
[ 0.540556653169, 0.89306384334 , 0.243935967739],  
[ 0.875545660276, 0.885658356473, 0.24556726607 ],  
[ 0.964005574285, 0.146439524954, 0.243985828527],  
[ 0.253606886656, 0.544249397688, 0.265496698726],  
[ 0.166458912778, 0.569547294613, 0.267304554249],  
[ 0.874846027804, 0.245365264498, 0.279149070217],  
[ 0.909498622417, 0.204231839789, 0.276541251658],  
[ 0.603245155453, 0.545418534998, 0.266928442623],  
[ 0.845225432583, 0.928169861185, 0.264959226729],  
[ 0.641859701398, 0.580610738714, 0.263062204786],  
[ 0.827837215603, 0.979302854229, 0.259126031927],  
[ 0.952736452437, 0.220926125376, 0.287871385897],  
[ 0.892434672012, 0.158877095756, 0.288648273892],  
[ 0.608470209669, 0.507170525086, 0.283385724834],  
[ 0.824324964515, 0.906446445926, 0.283998882303],  
[ 0.070154807551, 0.060547491989, 0.323124961452],  
[ 0.419728795863, 0.058596484539, 0.326771445705],  
[ 0.73115422482 , 0.068677813059, 0.324327105139],  
[ 0.221216662458, 0.054078800727, 0.331636445046],  
[ 0.566351342416, 0.038553908177, 0.306150051707],  
[ 0.883085150577, 0.073157563224, 0.326499441863],  
[ 0.035769208474, 0.220554939778, 0.325780430756],  
[ 0.429098240525, 0.222160343465, 0.306522702967],  
[ 0.703057565591, 0.232200694473, 0.304737916702],  
[ 0.083022572673, 0.374415778463, 0.32327475391 ],  
[ 0.415713938351, 0.390520890356, 0.324080539177],  
[ 0.722319345061, 0.396844301436, 0.314559546449],  
[ 0.234320857134, 0.369891616446, 0.312092241293],  
[ 0.561865094032, 0.400694451822, 0.30974442475 ],  
[ 0.879896778518, 0.383822497351, 0.314776666068],  
[ 0.047868667637, 0.544488271686, 0.316012506819],  
[ 0.384386321533, 0.56028362003 , 0.324835057924],  
[ 0.727802898838, 0.563965850027, 0.318347269371],  
[ 0.069579146201, 0.719328554432, 0.321174708656],  
[ 0.423618080633, 0.731811675973, 0.327540502601],  
[ 0.744444004294, 0.724486670561, 0.322961396921],  
[ 0.227625178763, 0.7203652184 , 0.317522285662],  
[ 0.573268825833, 0.746274296233, 0.310370150371],  
[ 0.898809983385, 0.714253807592, 0.30703959242 ],  
[ 0.06199910191 , 0.890001916689, 0.306519165841],  
[ 0.37892923007 , 0.89165343174 , 0.336497495646],  
[ 0.746593423132, 0.896641979273, 0.331184431022],  
[ 0.200174491488, 0.182044589233, 0.351554686301],  
[ 0.884126332609, 0.186894897196, 0.351152192497],  
[ 0.932206770263, 0.538427828486, 0.347407820167],  
[ 0.218092664392, 0.829369984482, 0.348904908951],  
[ 0.182116358246, 0.271403218442, 0.364789856809],  
[ 0.864831571067, 0.280739446644, 0.35316059236 ],

[ 0.896972658391, 0.618614121967, 0.360058465327],  
[ 0.173821946758, 0.911698229932, 0.351919615226],  
[ 0.193717201958, 0.218010367239, 0.368982775971],  
[ 0.864469140541, 0.229970199671, 0.363235396407],  
[ 0.897028753578, 0.563161048141, 0.360676326805],  
[ 0.200997415299, 0.871705437771, 0.362156297961],  
[ 0.049937886264, 0.026995913605, 0.393364335787],  
[ 0.462876178692, 0.072354934725, 0.392300026912],  
[ 0.696507435625, 0.081955054084, 0.392292676719],  
[ 0.214306818935, 0.136839754469, 0.399363906026],  
[ 0.83888366916, 0.157875273511, 0.396337403126],  
[ 0.201019162895, 0.194429677977, 0.396653261308],  
[ 0.569513885562, 0.237130413679, 0.368143497398],  
[ 0.83643321869, 0.214802926611, 0.38900998032 ],  
[ 0.126285829789, 0.383774263259, 0.387963994467],  
[ 0.448328551383, 0.39181446424, 0.390550872099],  
[ 0.697868181968, 0.399189872536, 0.387474181035],  
[ 0.849386571352, 0.466071064202, 0.368824410919],  
[ 0.210852004079, 0.549947994588, 0.365090763498],  
[ 0.563844744715, 0.557404250214, 0.361391855711],  
[ 0.848577846835, 0.525129799079, 0.372805569654],  
[ 0.062406053649, 0.725706210683, 0.390006765518],  
[ 0.472519270316, 0.724933667004, 0.392978020111],  
[ 0.77028708611, 0.73512882663, 0.392377214208],  
[ 0.240794648986, 0.825695167568, 0.400224376336],  
[ 0.21025143289, 0.870079426756, 0.391198489199],  
[ 0.570062219987, 0.901481347158, 0.374543281727],  
[ 0.92639972118, 0.872794650061, 0.367596569666],  
[ 0.192600814453, 0.235004001157, 0.420622383193],  
[ 0.806074248156, 0.261164246845, 0.407041442596],  
[ 0.799880531425, 0.550843041868, 0.389290060607],  
[ 0.186659103514, 0.918559889909, 0.410212870614],  
[ 0.176882477843, 0.287597595879, 0.41710686877 ],  
[ 0.788147176773, 0.311272998683, 0.399960960472],  
[ 0.791076914416, 0.606407102801, 0.391303470388],  
[ 0.151422909057, 0.957473438919, 0.403808183005],  
[ 0.202187187042, 0.217418182112, 0.442559463919],  
[ 0.783374508148, 0.240640939496, 0.425662787656],  
[ 0.762106931958, 0.514583793445, 0.394219610903],  
[ 0.193691887603, 0.910563919041, 0.43247269903 ],  
[ 0.783653303344, 0.087262209661, 0.451011397067],  
[ 0.787751296184, 0.574240070144, 0.460998495281],  
[ 0.198653552264, 0.452761127996, 0.466536116011],  
[ 0.201601596111, 0.945291897068, 0.474900974325],  
[ 0.73428092443, 0.186324164534, 0.481689230491],  
[ 0.765152949372, 0.708241076536, 0.468760160253],  
[ 0.24156051651, 0.329603810636, 0.481469726939],  
[ 0.250416096627, 0.816808329958, 0.486201310968],  
[ 0.137633246695, 0.38455670167, 0.458478461346],  
[ 0.140290136285, 0.872850835392, 0.473265346281],  
[ 0.848240518378, 0.15240029121, 0.4593985909 ],  
[ 0.8605188421, 0.620660832476, 0.474119469784],  
[ 0.164736949217, 0.41236231618, 0.476736433729],  
[ 0.175012555267, 0.903043829359, 0.487865808017],  
[ 0.814130571176, 0.111600519361, 0.469091079597],  
[ 0.809522421038, 0.604014012118, 0.480182262223],  
[ 0.213795079851, 0.20315161732, 0.480146457027],  
[ 0.223201494234, 0.684107611741, 0.498482324886],

[ 0.772370163541, 0.312278077475, 0.494595727931],  
[ 0.77910290354 , 0.84119270075 , 0.496121316654],  
[ 0.929164798427, 0.304153404512, 0.452884795628],  
[ 0.94058854744 , 0.800038080507, 0.456897595505],  
[ 0.768796075318, 0.146718567722, 0.492083587744],  
[ 0.767543366218, 0.669680247785, 0.48778562948 ],  
[ 0.206343865271, 0.360973736461, 0.495493398273],  
[ 0.224507590051, 0.852162751515, 0.502624369282],  
[ 0.738806374112, 0.105562688317, 0.503947078324],  
[ 0.715954307581, 0.653939862383, 0.493597557419],  
[ 0.059538037154, 0.165795239985, 0.4512688219 ],  
[ 0.066901569813, 0.699121589364, 0.459778590505],  
[ 0.235083972916, 0.390934366902, 0.512642333843],  
[ 0.262628452638, 0.882679330208, 0.515251888132],  
[ 1.013679615058, 0.326221417954, 0.494893510294],  
[ 1.013122901617, 0.839115367883, 0.500949965463],  
[-0.032225185282, 0.159912771705, 0.491738773403],  
[-0.024049654699, 0.679134200523, 0.498825180955],  
[ 0.992420111346, 0.40757674662 , 0.474819604305],  
[ 0.997551658105, 0.911700490524, 0.474911287477],  
[ 0.127709260166, 0.441336780235, 0.490579520443],  
[ 0.144758311257, 0.930731871482, 0.50510790397 ],  
[ 0.844411613069, 0.068198803074, 0.479338766733],  
[ 0.812550900494, 0.566857809778, 0.499554512917],  
[-0.007848914726, 0.071706903799, 0.478134389551],  
[-0.001211624556, 0.59537875507 , 0.480922992365],  
[ 0.973159424137, 0.364838569446, 0.489944389238],  
[ 0.974158398094, 0.874921613216, 0.491519686995],  
[ 0.915085503762, 0.326280068539, 0.475095389788],  
[ 0.920219109656, 0.830394553937, 0.476296250252],  
[ 0.008925506765, 0.12023865697 , 0.490621562608],  
[ 0.016635890596, 0.639486730349, 0.495787235533],  
[ 0.069060264397, 0.152663161713, 0.475154825464],  
[ 0.077711441193, 0.674629266823, 0.481993805813],  
[ 0.823140048572, 0.268380314894, 0.510655411976],  
[ 0.821206996021, 0.787401011057, 0.511964966925],  
[ 0.1623524166 , 0.226798587303, 0.502494447063],  
[ 0.174028067872, 0.724527444763, 0.516828494847],  
[ 0.806547461238, 0.183549588185, 0.515367925352],  
[ 0.794911637044, 0.704910473747, 0.514206119965],  
[ 0.165401837159, 0.310172007469, 0.512396806793],  
[ 0.190927450935, 0.808262725669, 0.524677375437],  
[ 0.894187545738, 0.264121497159, 0.492777583848],  
[ 0.894380019962, 0.775806913553, 0.4965652162 ],  
[ 0.0872119558 , 0.22012980695 , 0.490182581255],  
[ 0.101419189306, 0.733332690425, 0.501108194547],  
[ 0.871822492747, 0.362600496275, 0.471779293136],  
[ 0.878439968632, 0.864662038816, 0.468364320051],  
[ 0.735093759872, 0.22409201255 , 0.557697057935],  
[ 0.731442716603, 0.727323119816, 0.558566762677],  
[ 0.610909395012, 0.206251634914, 0.545889075639],  
[ 0.605807459105, 0.707217150801, 0.543997527466],  
[ 0.485621540982, 0.191197967074, 0.535979520807],  
[ 0.473262762458, 0.694166760093, 0.534714035168],  
[ 0.276150517327, 0.262055916778, 0.53998889475 ],  
[ 0.265545695364, 0.769780665957, 0.562960743533],  
[ 0.111892315784, 0.114717256892, 0.475398811037],  
[ 0.11844486036 , 0.634915565576, 0.478839058726],

[ 0.401240848281, 0.293957570201, 0.542563378492],  
[ 0.39191318491 , 0.797864469964, 0.547544793269],  
[ 0.365166962668, 0.168385228395, 0.530258454166],  
[ 0.339914086127, 0.682157163978, 0.535044145067],  
[ 0.256955069719, 0.123999006012, 0.526619398002],  
[ 0.244341383011, 0.617210982498, 0.552645399728],  
[ 0.957753262511, 0.391217832467, 0.51110940621 ],  
[ 0.952838436159, 0.908789190502, 0.50963682787 ],  
[ 0.530128972063, 0.314530607223, 0.539455666454],  
[ 0.523994834351, 0.813344375205, 0.536890882543],  
[ 0.661437776372, 0.324861574978, 0.537593487823],  
[ 0.657529456359, 0.825874099204, 0.536777633243],  
[ 0.765235743613, 0.374656558804, 0.551476491725],  
[ 0.757443099893, 0.881472681067, 0.556063782428],  
[ 0.021809321715, 0.103379020866, 0.5137361902 ],  
[ 0.028747060048, 0.615815214744, 0.517967132749],  
[ 0.725775024135, 0.274768933518, 0.570349053716],  
[ 0.718917166352, 0.777203155654, 0.571130067042],  
[ 0.602375318331, 0.248479016939, 0.563242088017],  
[ 0.596555708057, 0.749062419463, 0.56141035747 ],  
[ 0.478882723219, 0.22092676913 , 0.557402110293],  
[ 0.472192486277, 0.722157259621, 0.556725221095],  
[ 0.283761657564, 0.21473409876 , 0.554908396872],  
[ 0.280759107153, 0.717170551398, 0.572735862784],  
[ 0.40771165968 , 0.249645883999, 0.559115869774],  
[ 0.40223031027 , 0.75133092021 , 0.56264768342 ],  
[ 0.532274269771, 0.279503219391, 0.559677725459],  
[ 0.526551978871, 0.780176380485, 0.557628098468],  
[ 0.356376466357, 0.190486332326, 0.553060060706],  
[ 0.347515830376, 0.694373878766, 0.559195771163],  
[ 0.657879465476, 0.304889045462, 0.561066630787],  
[ 0.651806134731, 0.805845631967, 0.560113328121],  
[ 0.23590664945 , 0.153645551962, 0.54605298378 ],  
[ 0.225776428238, 0.660216103689, 0.567787532479],  
[ 0.165212566752, 0.177631199369, 0.537579887283],  
[ 0.161025350339, 0.689756761818, 0.554283066335],  
[ 0.843295528473, 0.295718435086, 0.548678249966],  
[ 0.837582031849, 0.805109351131, 0.551253778354],  
[ 0.783241391487, 0.328383642416, 0.565003956123],  
[ 0.775833761061, 0.832786640204, 0.568030706751],  
[ 0.884325019556, 0.335496012913, 0.546786167272],  
[ 0.877906401722, 0.8460958043 , 0.551899953335],  
[ 0.131999154936, 0.129992075907, 0.534954225304],  
[ 0.12313510267 , 0.646399634105, 0.552582262858],  
[ 0.724541035376, 0.258639285566, 0.594324129741],  
[ 0.714093349669, 0.760000598334, 0.594865494445],  
[ 0.605667993239, 0.220002964404, 0.585162963597],  
[ 0.598967219411, 0.720256586776, 0.583271006522],  
[ 0.142466705974, 0.212849077152, 0.554917055059],  
[ 0.139168725149, 0.73385511 , 0.567933597396],  
[ 0.863782073043, 0.247820780803, 0.560490739668],  
[ 0.857853267188, 0.754871907935, 0.561357479976],  
[ 0.486522978446, 0.18034496114 , 0.575457929686],  
[ 0.483502913164, 0.67994216202 , 0.573727630415],  
[ 0.272112217457, 0.234086100798, 0.577903703848],  
[ 0.286807600989, 0.727514112919, 0.597089339987],  
[ 0.399070520292, 0.274336296168, 0.581485226457],  
[ 0.401076278166, 0.77382599299 , 0.585723500578],

[ 0.364913630951, 0.144719322005, 0.568746405152],  
[ 0.36403770551 , 0.642937716368, 0.569793745634],  
[ 0.232641991527, 0.11405540946 , 0.564683549121],  
[ 0.213889446015, 0.632905271416, 0.589205271299],  
[ 0.521110645656, 0.31537120073 , 0.579012692214],  
[ 0.516561740635, 0.818000748131, 0.576484758933],  
[ 0.64548505979 , 0.35262628375 , 0.575197951392],  
[ 0.637475928059, 0.853694768848, 0.573755363505],  
[ 0.800308875044, 0.351589305181, 0.586553417441],  
[ 0.791947125326, 0.851416413537, 0.590504402526]

## References

1. L. Bammer, E. A. Bruton, P. Sherwood, *Crystal Growth & Design*, **2001**, 14, 277-290.
2. X. Y. Chin, D. Cortecchia, J. Yin, A. Bruno, C. Soci, *Nat. Commun.*, **2015**, 6, 7383.
3. F. Li, c. Ma, H. Wang, W. Hu, W. Yu, A. D. Sheikh, T. Wu, *Nat Commun.*, **2015**, 6, 8238.
4. Y. Mei, C. Zhang, Z. V. Vardeny, O. D. Jurchescu, *MRS Commun.*, **2015**, 5, 297.
5. A. R. B. M. Yusoff, H. P. Kim, X. Li, J. Kim, J. Jang, M. K. Nazeeruddin, *Adv. Mater.*, **2017**, 29, 1602940.
6. S. P. Senanayak, B. Yang, T. H. Thomas, N. Giesbrecht, W. Huang, E. Gann, B. Nair, K. Goedel, S. Guha, X. Moya, C. R. McNeill, P. Docampo, A. Sadhanala, R. H. Friend, H. Sirringhaus, *Sci. Adv.*, **2017**, 3, e1601935.
7. C. Huo, X. Liu, X. Song, Z. Wang, H. Zeng, *J. Phys. Chem. Lett.*, **2017**, 17, 8, 4785-4792.
8. F. Zhang, H. Zhang, L. Zhu, L. Qin, Y. Wang, Y. Hu, Z. Lou, Y. Hou, F. Ten, *J. Mater. Chem. C*, **2019**, 7, 4004-4012.
